# Supplementary material for: Uniform Sb2S3optical coatings by chemical spray method
Source: publisher site journal article supplement (doi:10.3762/bjnano.10.18), 2019-01-15
Supplement: Additional file 1 [file 2190-4286-10-18-S1.pdf]

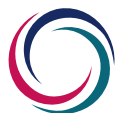

## Supporting Information

for

### **Uniform $\text{Sb}_2\text{S}_3$ optical coatings by chemical spray method**

Jako S. Eensalu, Atanas Katerski, Erki Kärber, Ilona Oja Acik, Arvo Mere  
and Malle Krunk

*Beilstein J. Nanotechnol.* **2019**, *10*, 198–210. [doi:10.3762/bjnano.10.18](https://doi.org/10.3762/bjnano.10.18)

### **Additional XRD, EDX data, SEM images, Lorentzian fitting of $\text{Sb}_2\text{S}_3$ Raman vibrational bands, and Tauc plots**

## Comment S1

The volatilization of  $\text{Sb}_2\text{S}_3$  layers during vacuum treatment is supported by  $\text{Sb}_2\text{S}_3$  vapor pressure data we calculated using the Antoine equation and constants provided by Piacente et al. [1]. The partial pressures were calculated by assuming an ideal gas mixture based on Dalton's law [2]. Accordingly, the sum of the partial pressures of all gases in the vacuum chamber was considered equal to the total system pressure.

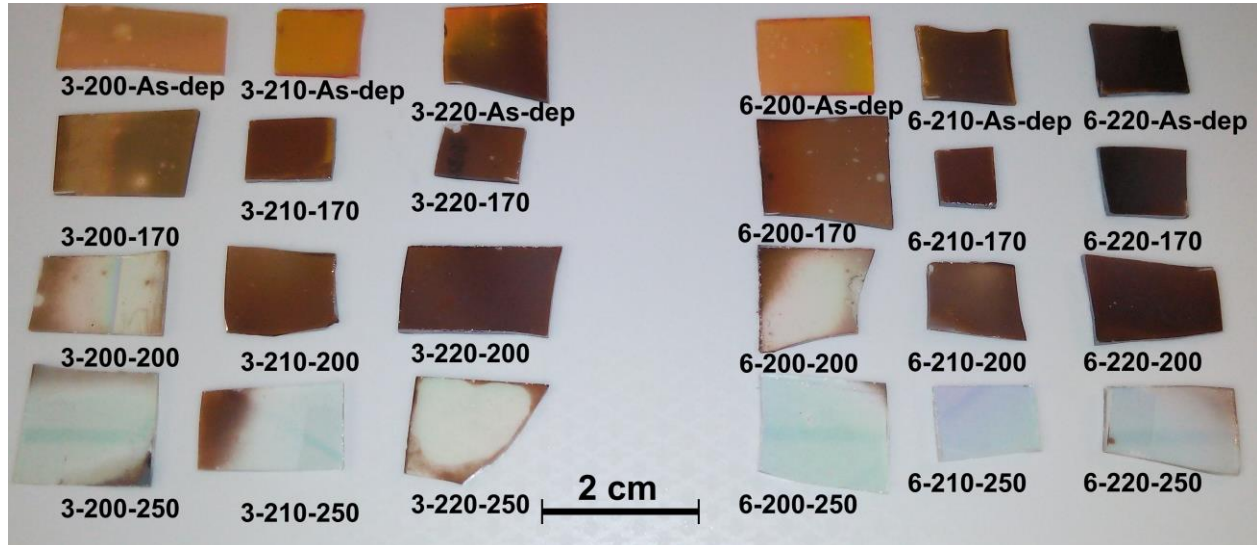

**Figure S1:** Photograph of as-deposited and vacuum treated glass/ITO/TiO<sub>2</sub>/Sb<sub>2</sub>S<sub>3</sub> samples on a white background. The appearance of darker Sb<sub>2</sub>S<sub>3</sub> layers was lustrous grey at  $\approx 90^\circ$  viewing angle and brown at smaller viewing angles. As the samples are very reflective, the photograph was taken at an angle to illustrate layer uniformity. Sb<sub>2</sub>S<sub>3</sub> layers were deposited at 200 °C, 210 °C, or 220 °C in air from 30 mM Sb/S 1:3 solution for 20 minutes (first, second, and third column on the left), or from 30 mM Sb/S 1:6 solution for 40 minutes (first, second, and third column on the right). Samples were vacuum treated at 170 °C, 200 °C, or 250 °C for 5 min at  $<4 \times 10^{-6}$  Torr (second, third, and fourth row, respectively). Sample names in figure: [Sb/S molar ratio in solution]-[Deposition temperature]-[Thermal treatment temperature].

**Table S1:** Band centers, and uncertainty, as a result of fitting of the Raman spectra of the as-deposited and vacuum heat treated Sb<sub>2</sub>S<sub>3</sub> films on glass/ITO/TiO<sub>2</sub> substrate. Sample names in table: [Sb/S molar ratio in solution]-[Deposition temperature]-[Thermal treatment temperature].

| Band center, cm <sup>-1</sup> | 281       | 301       | 310       | R <sup>2</sup> (COD) <sup>a</sup> |
|-------------------------------|-----------|-----------|-----------|-----------------------------------|
| 13-200-170                    | 281.7±0.1 | 300.7±0.2 | 309.0±0.2 | 0.99942                           |
| 13-210-As-dep.                | 281.8±0.1 | 301.6±0.2 | 309.6±0.1 | 0.99891                           |
| 13-210-170                    | 280.5±0.1 | 301.2±0.1 | 309.2±0.1 | 0.99851                           |
| 13-210-200                    | 281.2±0.1 | 302.6±0.2 | 310.5±0.1 | 0.99736                           |
| 13-220-As-dep.                | 281.5±0.1 | 301.2±0.2 | 309.0±0.1 | 0.99889                           |
| 13-220-170                    | 280.5±0.1 | 300.7±0.2 | 308.7±0.1 | 0.99844                           |
| 13-220-200                    | 281.0±0.1 | 300.1±0.2 | 308.5±0.2 | 0.99921                           |
|                               |           |           |           |                                   |
| 16-200-170                    | 281.6±0.1 | 301.4±0.1 | 310.4±0.1 | 0.99854                           |
| 16-210-As-dep.                | 281.9±0.2 | 298.8±0.5 | 307.0±0.4 | 0.99483                           |
| 16-210-170                    | 281.7±0.1 | 301.0±0.2 | 309.7±0.1 | 0.99882                           |
| 16-210-200                    | 280.8±0.2 | 301.2±0.4 | 309.3±0.2 | 0.99214                           |
| 16-220-As-dep.                | 281.6±0.1 | 302.0±0.3 | 310.0±0.1 | 0.99778                           |
| 16-220-170                    | 281.0±0.1 | 300.8±0.2 | 309.4±0.1 | 0.99864                           |
| 16-220-200                    | 280.7±0.1 | 300.9±0.2 | 309.1±0.1 | 0.99778                           |

<sup>a</sup>Coefficient of determination

**Table S2:** Relative intensities<sup>a</sup>, and uncertainty, as a result of fitting of the Raman spectra of the as-deposited and vacuum heat treated Sb<sub>2</sub>S<sub>3</sub> films on glass/ITO/TiO<sub>2</sub> substrate. Sample names in table: [Sb/S molar ratio in solution]-[Deposition temperature]-[Thermal treatment temperature].

| Band center, cm <sup>-1</sup> | 281                | 301       | 310       |                                   |
|-------------------------------|--------------------|-----------|-----------|-----------------------------------|
|                               | Relative intensity |           |           | R <sup>2</sup> (COD) <sup>b</sup> |
| 13-200-170                    | 0.28±0.01          | 0.54±0.03 | 0.18±0.02 | 0.99942                           |
| 13-210-As-dep.                | 0.45±0.01          | 0.37±0.01 | 0.18±0.01 | 0.99891                           |
| 13-210-170                    | 0.67±0.01          | 0.18±0.01 | 0.15±0.01 | 0.99851                           |
| 13-210-200                    | 0.60±0.01          | 0.26±0.01 | 0.15±0.01 | 0.99736                           |
| 13-220-As-dep.                | 0.65±0.01          | 0.21±0.02 | 0.14±0.01 | 0.99889                           |
| 13-220-170                    | 0.40±0.01          | 0.42±0.01 | 0.18±0.01 | 0.99844                           |
| 13-220-200                    | 0.57±0.01          | 0.28±0.02 | 0.15±0.02 | 0.99921                           |
|                               |                    |           |           |                                   |
| 16-200-170                    | 0.42±0.01          | 0.42±0.01 | 0.16±0.01 | 0.99854                           |
| 16-210-As-dep.                | 0.48±0.03          | 0.04±0.02 | 0.48±0.02 | 0.99483                           |
| 16-210-170                    | 0.48±0.01          | 0.35±0.01 | 0.16±0.01 | 0.99882                           |
| 16-210-200                    | 0.58±0.02          | 0.26±0.03 | 0.16±0.02 | 0.99214                           |
| 16-220-As-dep.                | 0.69±0.01          | 0.18±0.02 | 0.13±0.01 | 0.99778                           |
| 16-220-170                    | 0.51±0.01          | 0.33±0.01 | 0.16±0.01 | 0.99864                           |
| 16-220-200                    | 0.61±0.01          | 0.23±0.02 | 0.15±0.01 | 0.99778                           |

<sup>a</sup>Ratio of peak area to total area of peaks

<sup>b</sup>Coefficient of determination

**Table S3:** FWHM, and uncertainty, as a result of fitting of the Raman spectra of the as-deposited and vacuum heat treated  $\text{Sb}_2\text{S}_3$  films on glass/ITO/ $\text{TiO}_2$ / $\text{Sb}_2\text{S}_3$  substrate. Sample names in table: [Sb/S molar ratio in solution]-[Deposition temperature]-[Thermal treatment temperature].

| Band center, $\text{cm}^{-1}$ | 281                    | 301      | 310      |                          |
|-------------------------------|------------------------|----------|----------|--------------------------|
|                               | FWHM, $\text{cm}^{-1}$ |          |          | $R^2$ (COD) <sup>a</sup> |
| 13-200-170                    | 21.5±0.4               | 21.0±0.5 | 14.5±0.6 | 0.99942                  |
| 13-210-As-dep.                | 23.2±0.3               | 15.6±0.3 | 8.67±0.3 | 0.99891                  |
| 13-210-170                    | 22.3±0.3               | 15.0±0.3 | 8.04±0.2 | 0.99851                  |
| 13-210-200                    | 18.0±0.2               | 13.0±0.6 | 6.98±0.3 | 0.99736                  |
| 13-220-As-dep.                | 25.0±0.3               | 14.7±0.5 | 9.46±0.3 | 0.99889                  |
| 13-220-170                    | 23.6±0.3               | 14.1±0.6 | 8.83±0.3 | 0.99844                  |
| 13-220-200                    | 22.9±0.4               | 18.2±0.5 | 12.5±0.5 | 0.99921                  |
|                               |                        |          |          |                          |
| 16-200-170                    | 17.9±0.2               | 15.9±0.3 | 8.48±0.3 | 0.99854                  |
| 16-210-As-dep.                | 23.5±1                 | 9.53±3   | 21.6±0.6 | 0.99483                  |
| 16-210-170                    | 21.5±0.3               | 15.7±0.4 | 9.7±0.3  | 0.99882                  |
| 16-210-200                    | 21.5±0.5               | 14.5±1   | 8.57±0.6 | 0.99214                  |
| 16-220-As-dep.                | 23.6±0.3               | 13.3±0.8 | 8.51±0.4 | 0.99778                  |
| 16-220-170                    | 21.3±0.3               | 15.5±0.4 | 9.09±0.3 | 0.99864                  |
| 16-220-200                    | 21.9±0.3               | 13.8±0.6 | 8.69±0.3 | 0.99778                  |

**Table S4:** The positions of detected diffraction peaks and corresponding crystallographic plane indexes of  $\text{Sb}_2\text{S}_3$  layers deposited on glass/ITO/ $\text{TiO}_2$  substrate. Sample names in table: [Sb/S molar ratio in solution]-[Deposition temperature]-[Thermal treatment temperature].

| 2 $\theta$ , degree | Plane index, (h k l) |
|---------------------|----------------------|
| 11.1                | (1 0 1)              |
| 15.8                | (2 0 0)/(0 0 2)      |
| 17.7                | (2 0 1)/(1 0 2)      |
| 22.4                | (2 0 2)              |
| 25.1                | (3 0 1)/(1 0 3)      |
| 25.8                | (1 1 1)              |
| 28.2                | (2 1 0)/(0 1 2)      |
| 28.7                | (3 0 2)/(2 0 3)      |
| 29.3                | (2 1 1)/(1 1 2)      |
| 32.5                | (2 1 2)              |
| 33.5                | (3 1 0)/(0 1 3)      |
| 34.4                | (3 1 1)/(1 1 3)      |
| 35.8                | (4 0 2)/(2 0 4)      |

| 2 $\theta$ , degree | Plane index, (h k l)            |
|---------------------|---------------------------------|
| 37.2                | (3 1 2)/(2 1 3)                 |
| 39.8                | (4 1 0)/(0 1 4)                 |
| 40.2                | (4 0 3)/(3 0 4)                 |
| 40.7                | (4 1 1)/(1 1 4)                 |
| 43.1                | (4 1 2)/(2 1 4)                 |
| 43.4                | (5 0 2)/(2 0 5)                 |
| 46.9                | (4 1 2)/(2 1 4)/(5 1 0)/(0 1 5) |
| 47.2                | (5 0 3)/(3 0 5)                 |
| 47.4                | (0 2 0)                         |
| 47.6                | (5 1 1)/(1 1 5)                 |
| 48.7                | (6 0 0)/(0 0 6)                 |
| 49.4                | (6 0 1)/(1 0 6)                 |

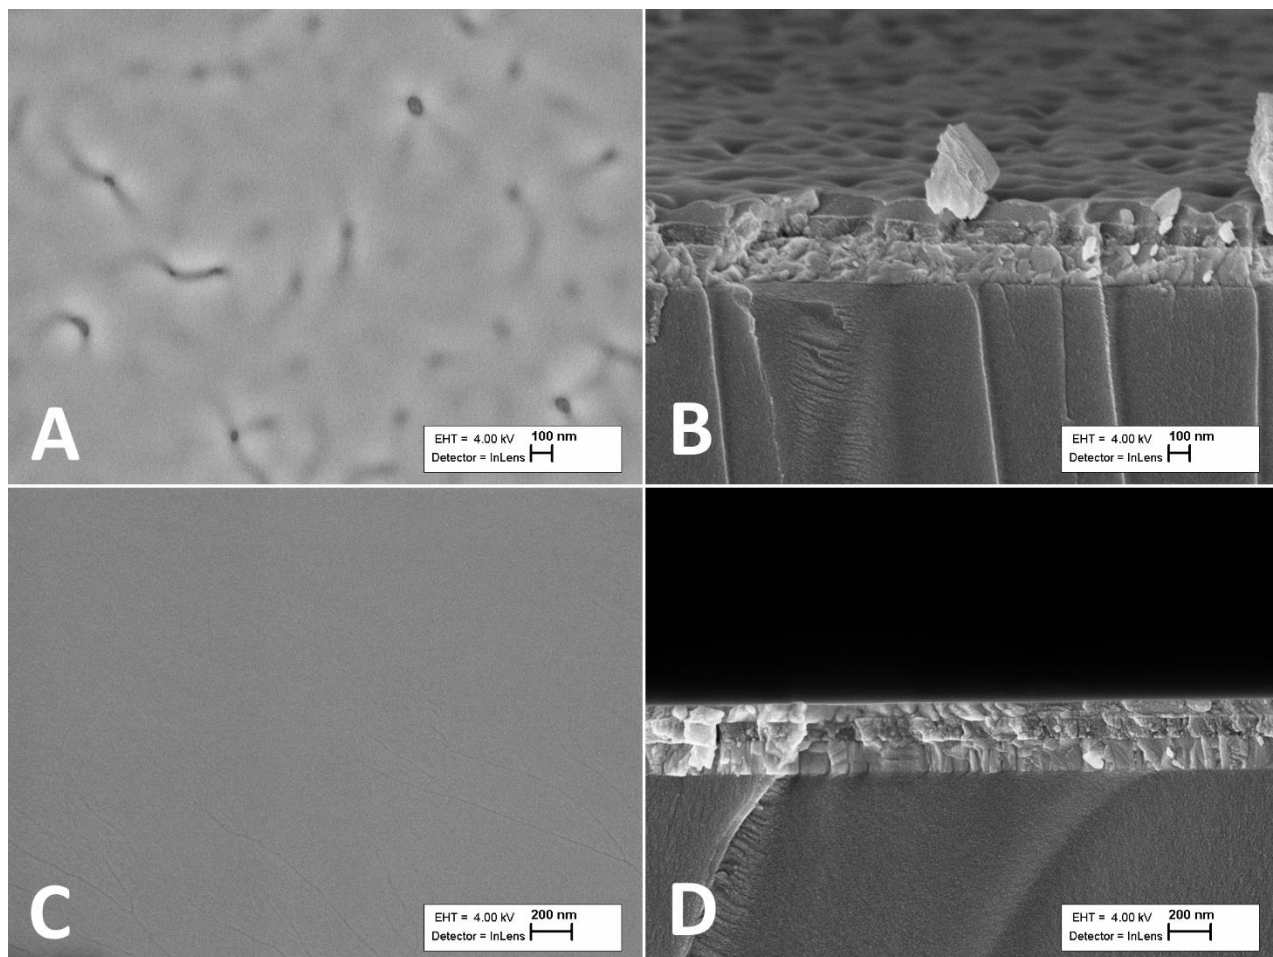

**Figure S2:** Surface views and cross-sectional views by SEM study of as-deposited (A, B) and vacuum heat treated (C, D) ( $170\text{ }^\circ\text{C}$ , 5 min,  $<4 \times 10^{-6}$  Torr)  $\text{Sb}_2\text{S}_3$  layers.  $\text{Sb}_2\text{S}_3$  layers were deposited from 30 mM Sb/S 1:3 solution for 20 min at  $210\text{ }^\circ\text{C}$  in air on glass/ITO/ $\text{TiO}_2$  substrate.

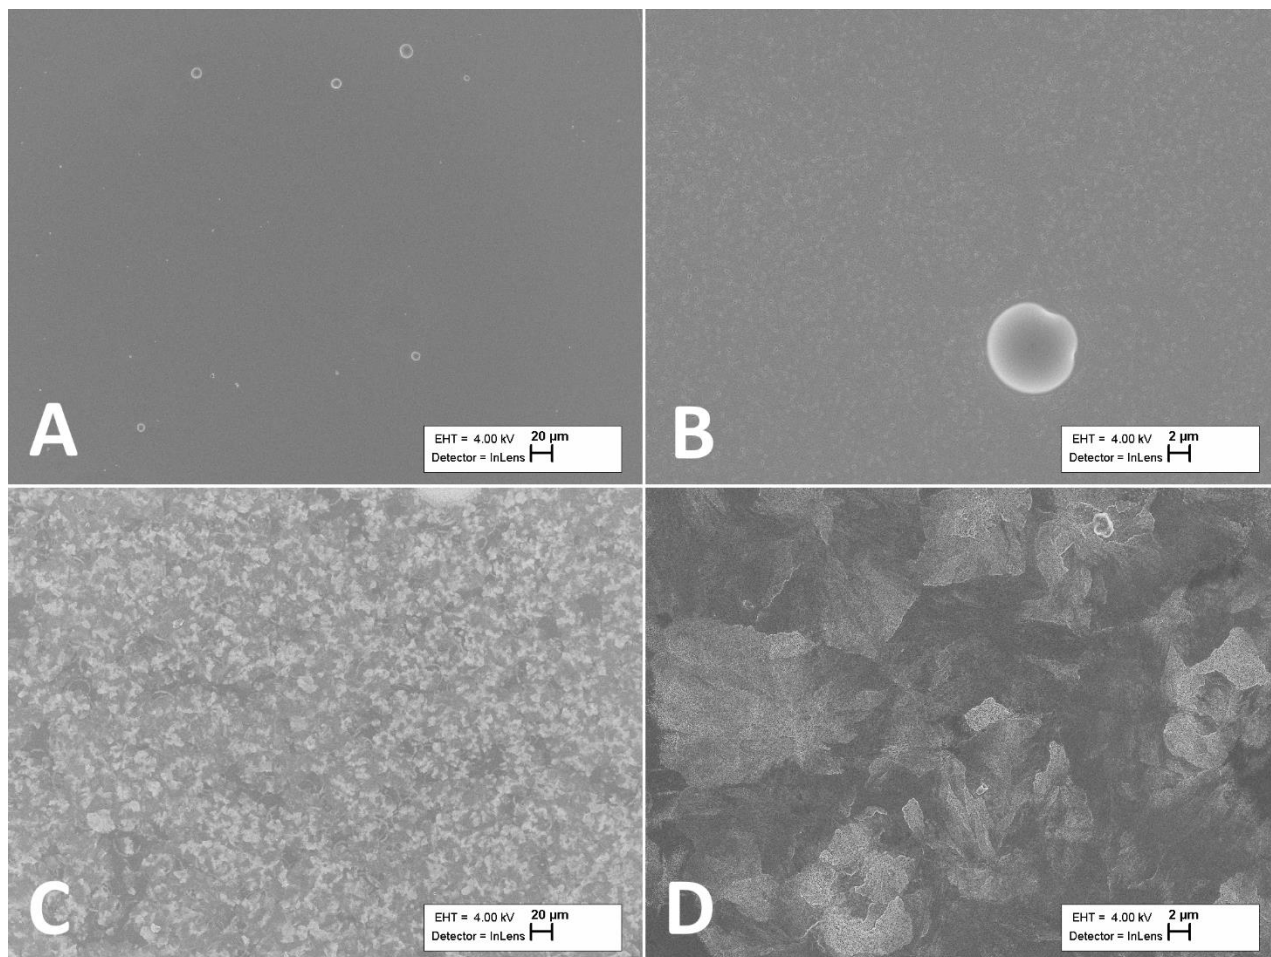

**Figure S3:** Surface views at different magnifications by SEM study of as-deposited  $\text{Sb}_2\text{S}_3$  layers.  $\text{Sb}_2\text{S}_3$  layers were deposited from 30 mM Sb/S 1:3 solution for 20 min at 210 °C (A, B) and 220 °C (C, D) in air on glass/ITO/ $\text{TiO}_2$  substrate.



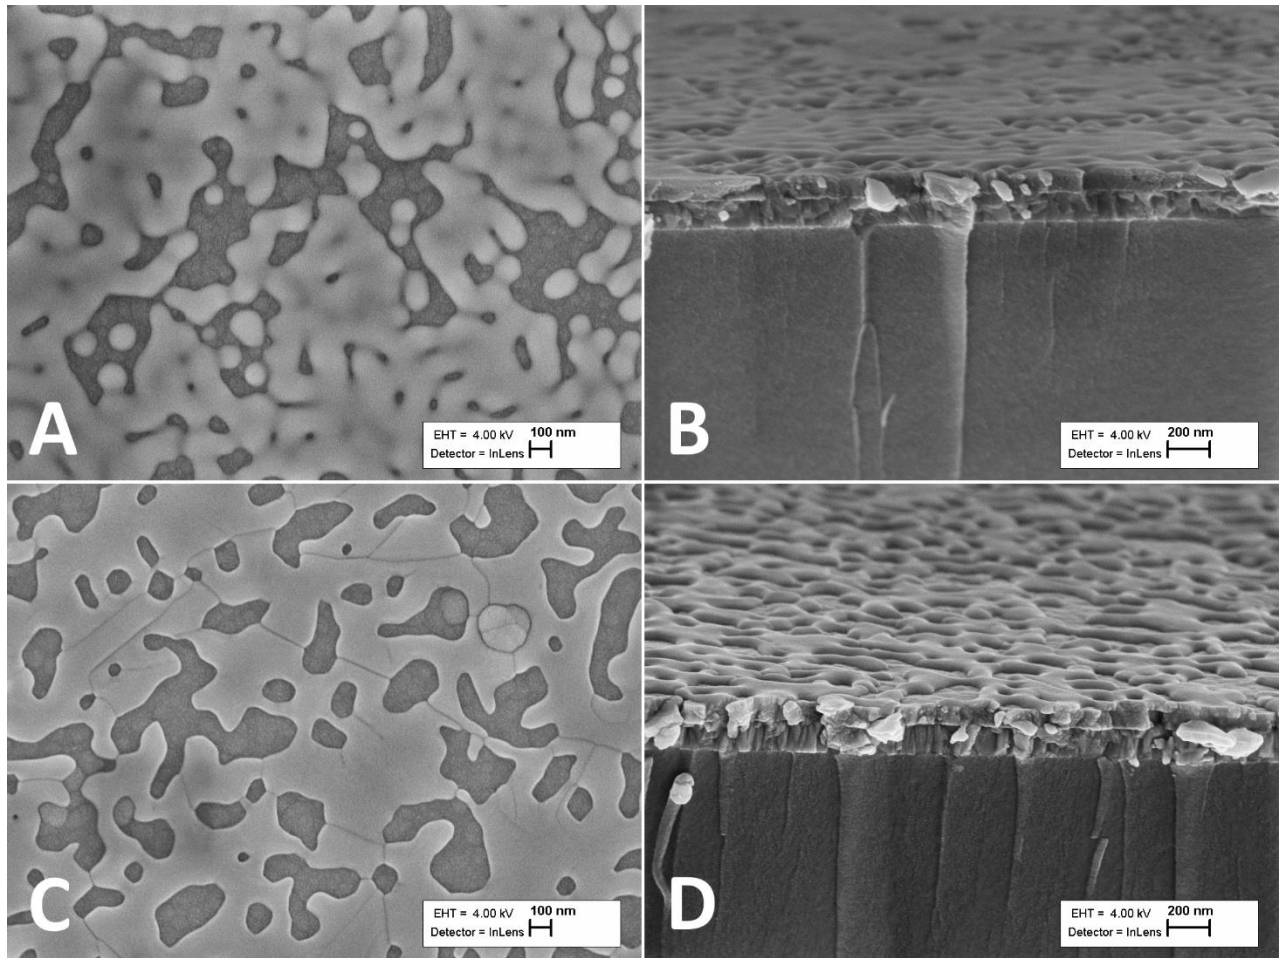

**Figure S4:** Surface views and cross-sectional views by SEM study of as-deposited (A, B) and vacuum heat treated (C, D) ( $170\text{ }^\circ\text{C}$ , 5 min,  $<4 \times 10^{-6}$  Torr)  $\text{Sb}_2\text{S}_3$  layers.  $\text{Sb}_2\text{S}_3$  layers were deposited from 30 mM Sb/S 1:6 solution for 20 min at  $210\text{ }^\circ\text{C}$  in air on glass/ITO/ $\text{TiO}_2$  substrate.

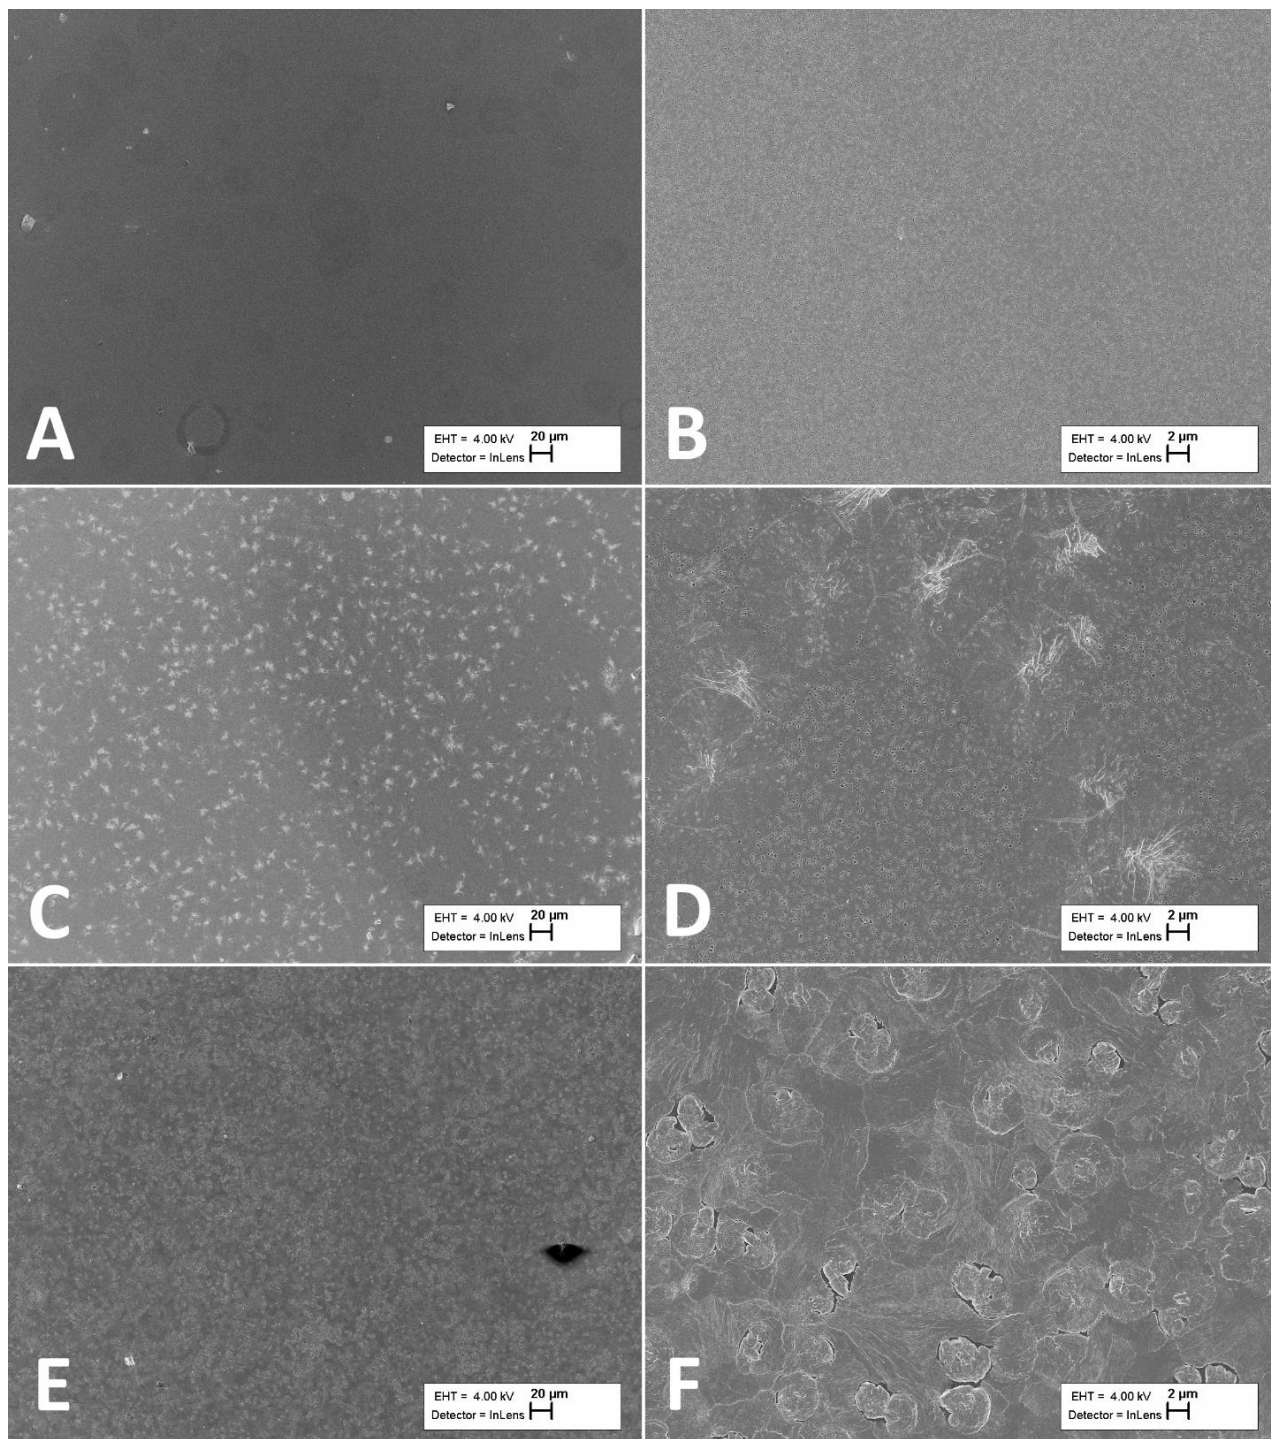

**Figure S5:** Surface views at different magnifications by SEM study of as-deposited Sb<sub>2</sub>S<sub>3</sub> layers. Sb<sub>2</sub>S<sub>3</sub> layers were deposited from 30 mM Sb/S 1:6 solution for 40 min at 200°C (A, B), 210°C (C, D) or 220°C (E, F) in air on glass/ITO/TiO<sub>2</sub> substrate.

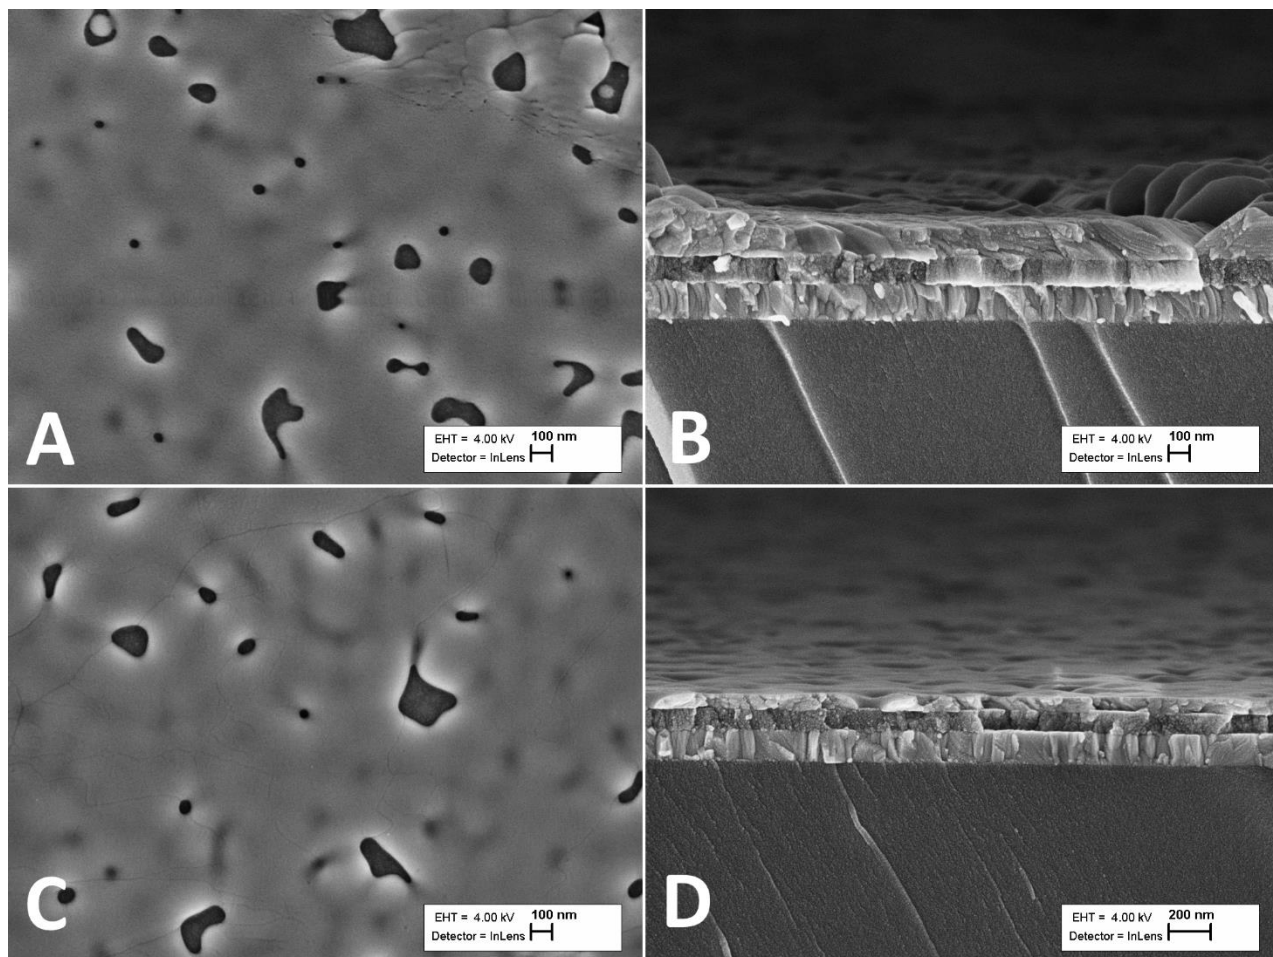

**Figure S6:** Surface views and cross-sectional views by SEM study of as-deposited (A, B) and vacuum heat treated (C, D) ( $170\text{ }^\circ\text{C}$ , 5 min,  $<4 \times 10^{-6}$  Torr)  $\text{Sb}_2\text{S}_3$  layers.  $\text{Sb}_2\text{S}_3$  layers were deposited from 30 mM Sb/S 1:6 solution for 40 min at  $210\text{ }^\circ\text{C}$  in air on glass/ITO/ $\text{TiO}_2$  substrate.

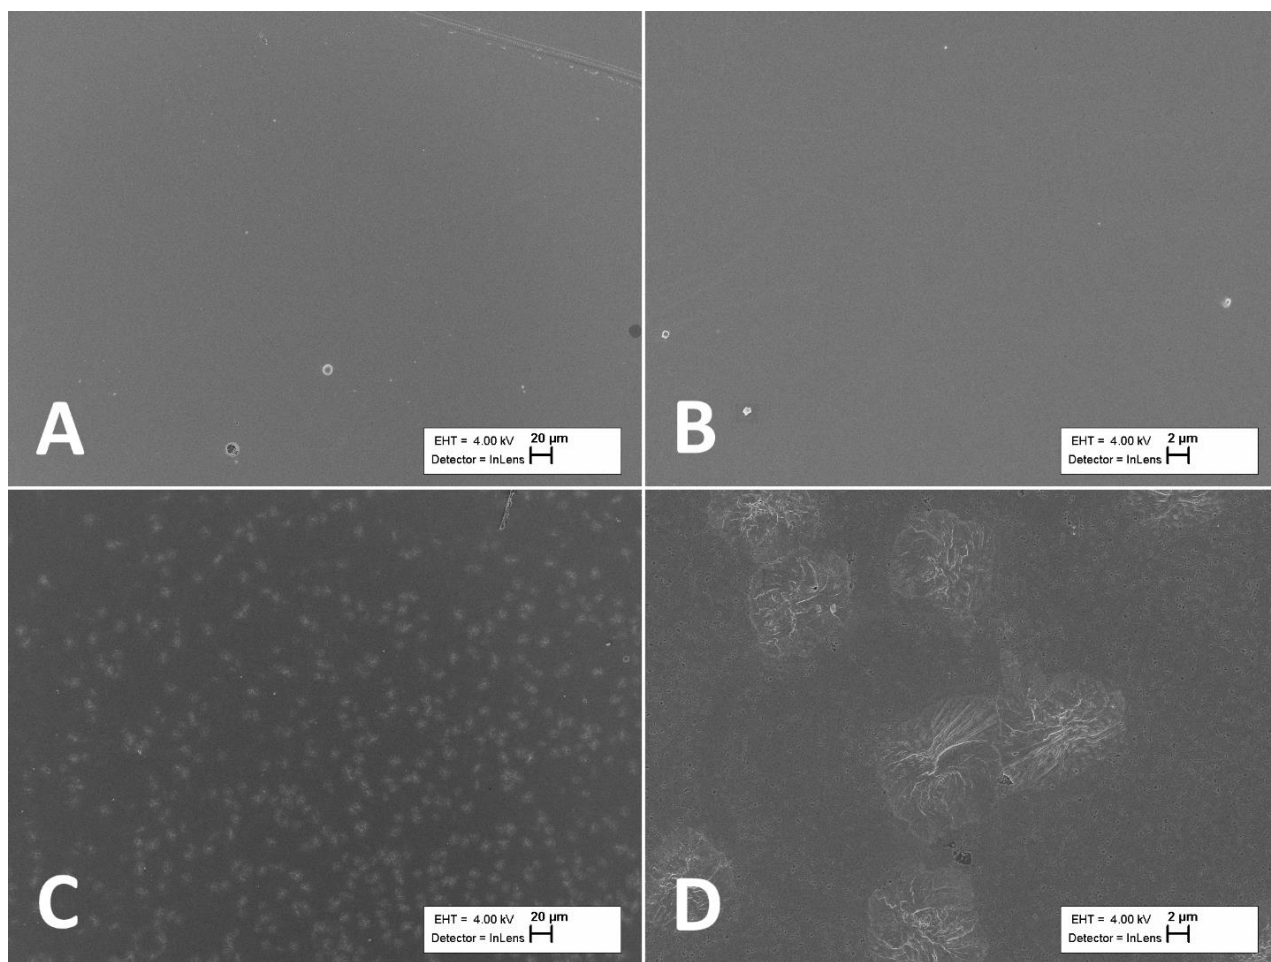

**Figure S7:** Surface views at different magnifications by SEM study of vacuum heat treated (170 °C, 5 min,  $<4 \times 10^{-6}$  Torr)  $\text{Sb}_2\text{S}_3$  layers.  $\text{Sb}_2\text{S}_3$  layers were deposited from 30 mM Sb/S 1:3 solution for 20 min at 210 °C (**A, B**) or 220 °C (**C, D**) in air on glass/ITO/ $\text{TiO}_2$  substrate.

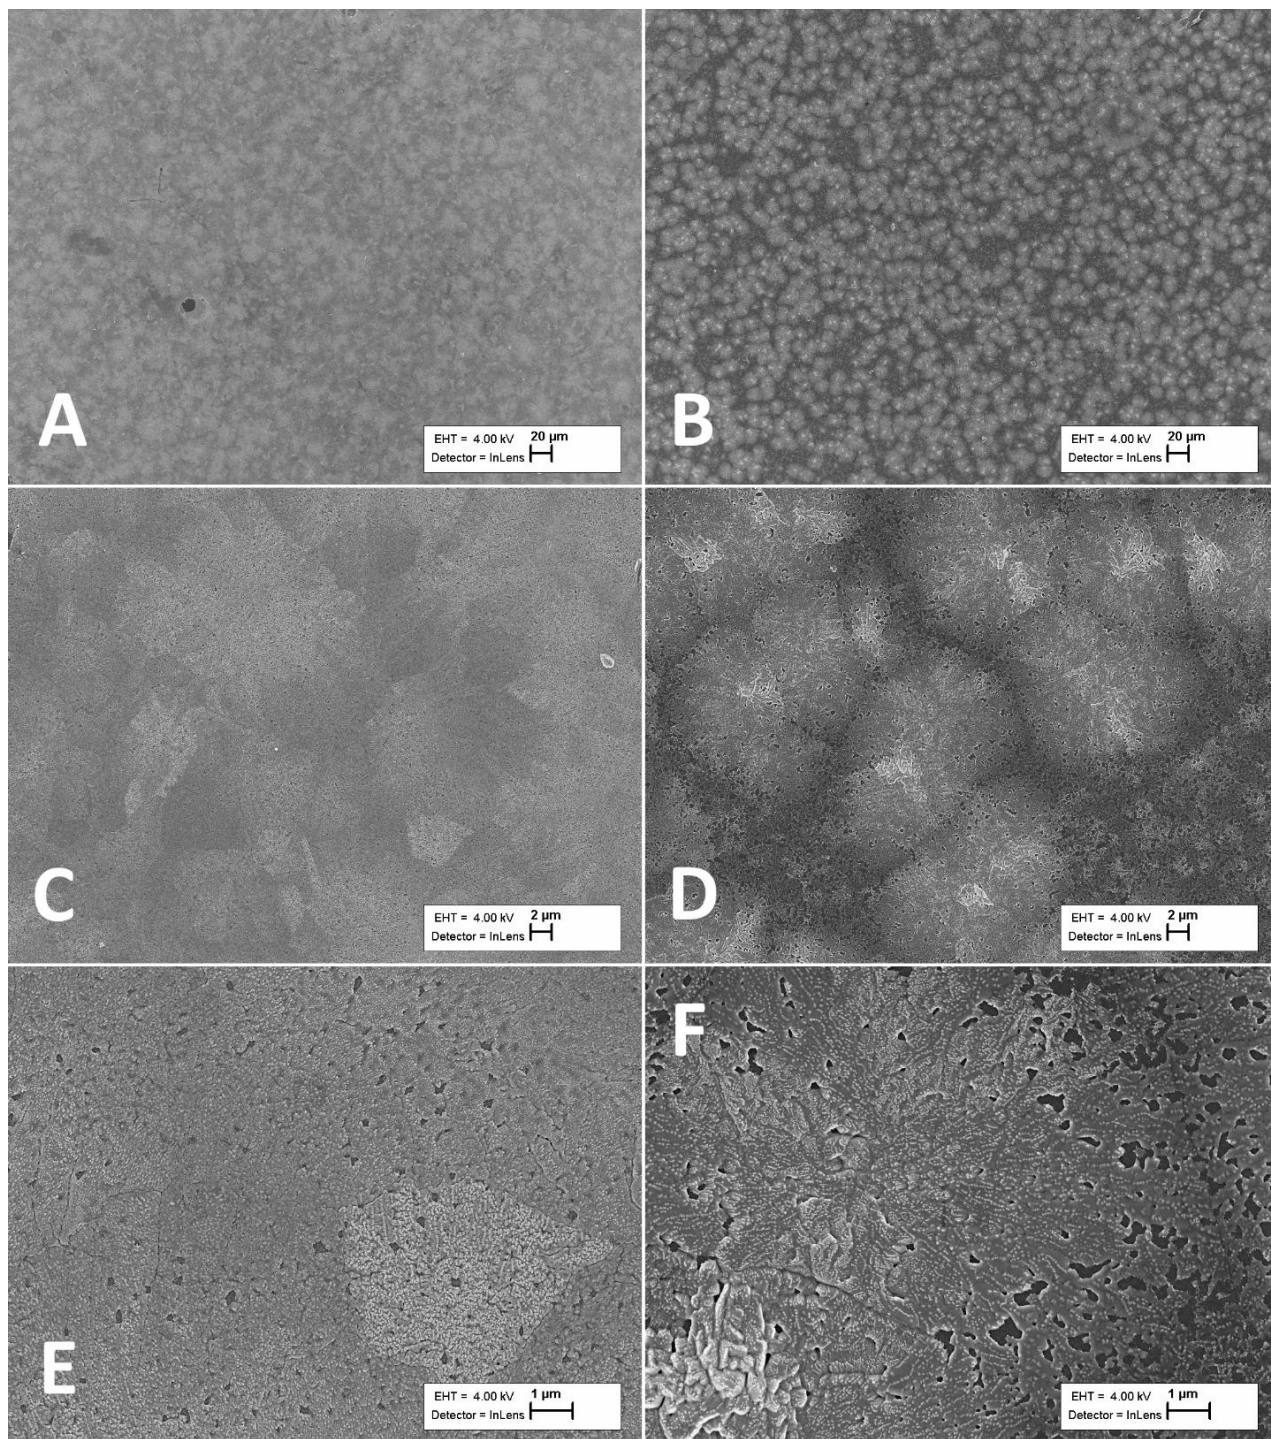

**Figure S8:** Surface views at different magnifications by SEM study of vacuum heat treated (200 °C, 5 min,  $<4 \times 10^{-6}$  Torr) Sb<sub>2</sub>S<sub>3</sub> layers. Sb<sub>2</sub>S<sub>3</sub> layers were deposited from 30 mM Sb/S 1:3 solution for 20 min (A, C, E) and from Sb/S 1:6 solution for 40 min (B, D, F) at 210 °C in air on glass/ITO/TiO<sub>2</sub> substrate.

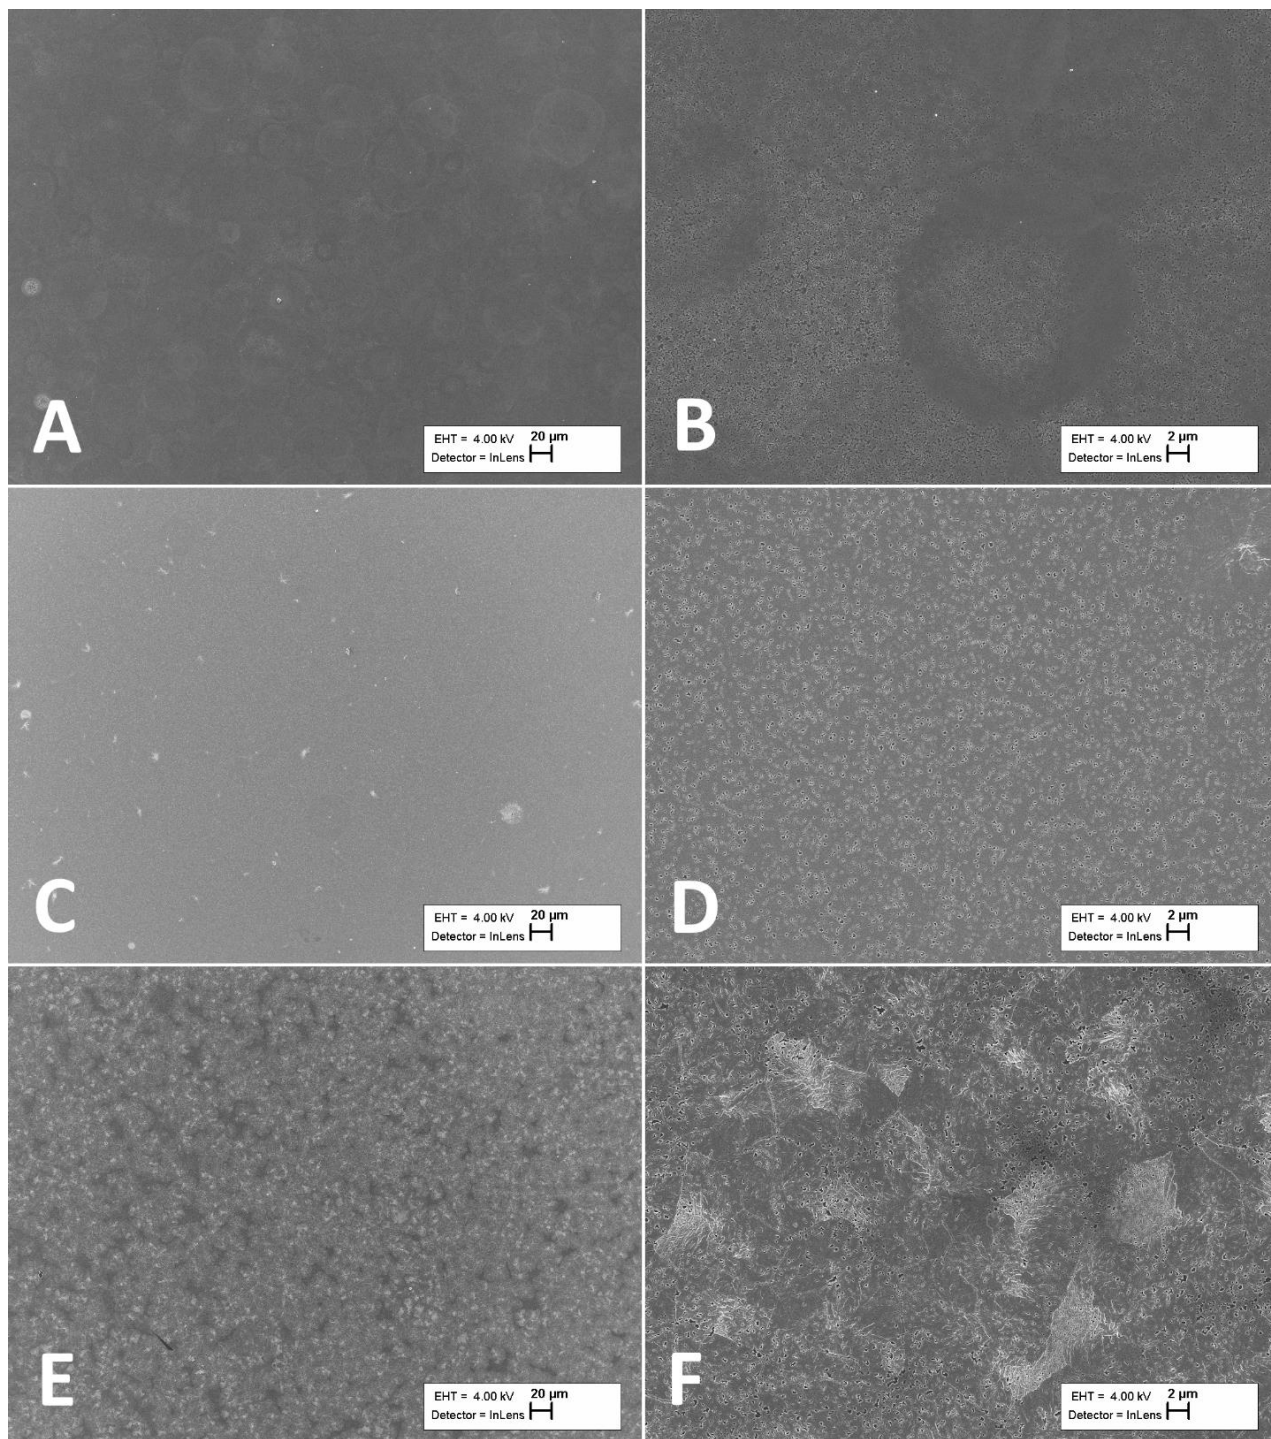

**Figure S9:** Surface views at different magnifications by SEM study of vacuum heat treated (170 °C, 5 min,  $<4 \times 10^{-6}$  Torr) Sb<sub>2</sub>S<sub>3</sub> layers. Sb<sub>2</sub>S<sub>3</sub> layers were deposited from 30 mM Sb/S 1:6 solution for 40 min at 200 °C (A, B), 210 °C (C, D) or 220 °C (E, F) in air on glass/ITO/TiO<sub>2</sub> substrate.

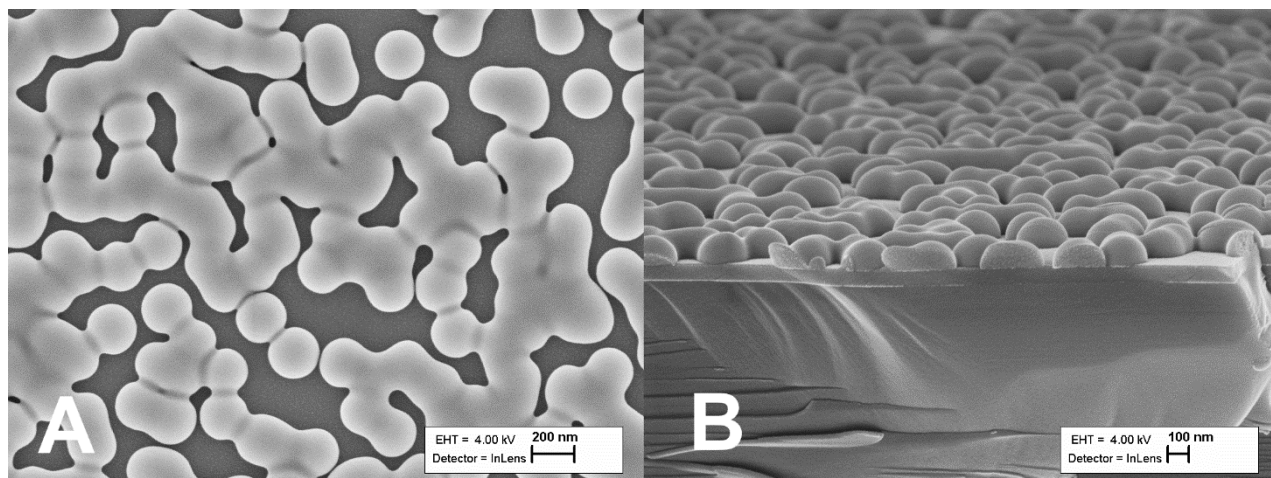

**Figure S10:** Surface view (A) and cross-sectional view (B) by SEM study of as-deposited  $\text{Sb}_2\text{S}_3$  layers.  $\text{Sb}_2\text{S}_3$  layers were deposited from 30 mM Sb/S 1:3 solution for 20 min at 210 °C in air on Si/SiO<sub>2</sub> substrate.

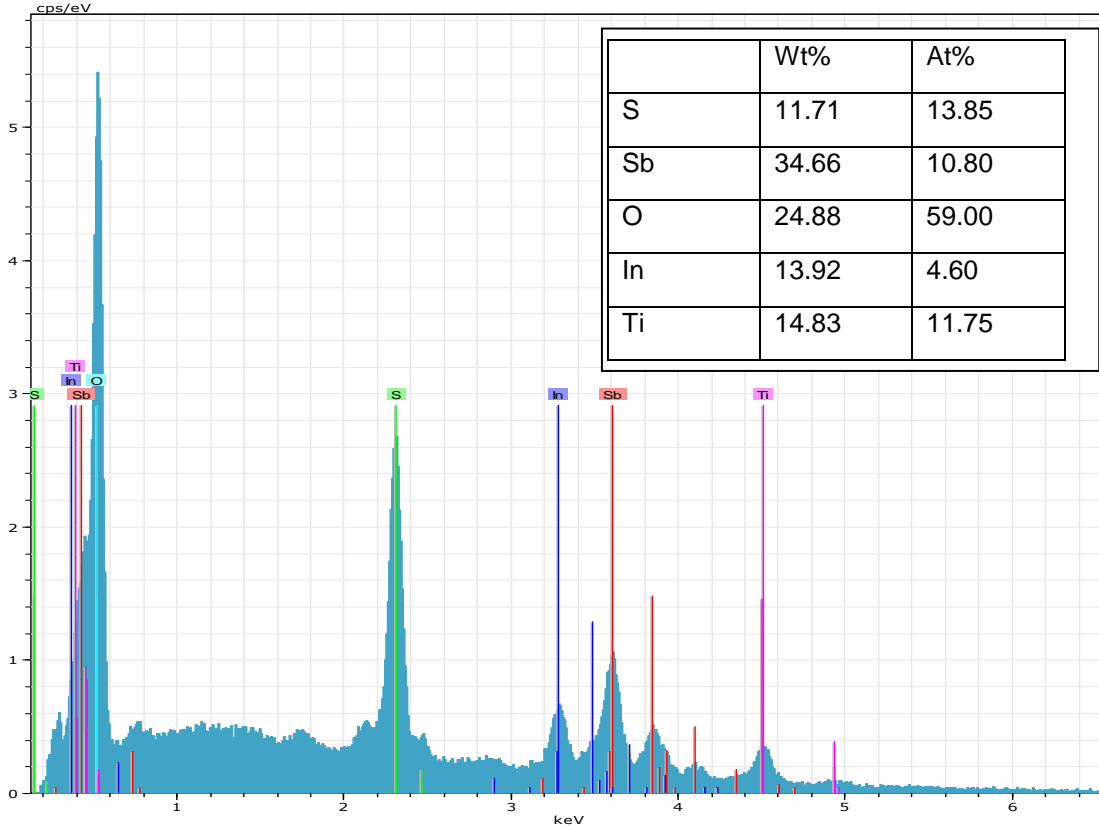

**Figure S11:** EDX spectrum of glass/ITO/TiO<sub>2</sub>/Sb<sub>2</sub>S<sub>3</sub> sample vacuum heat treated at 170 °C for 5 min (3-210-170). Sb<sub>2</sub>S<sub>3</sub> was deposited from Sb/S 1:3 precursor solution at  $T_D$  210 °C for 20 min.

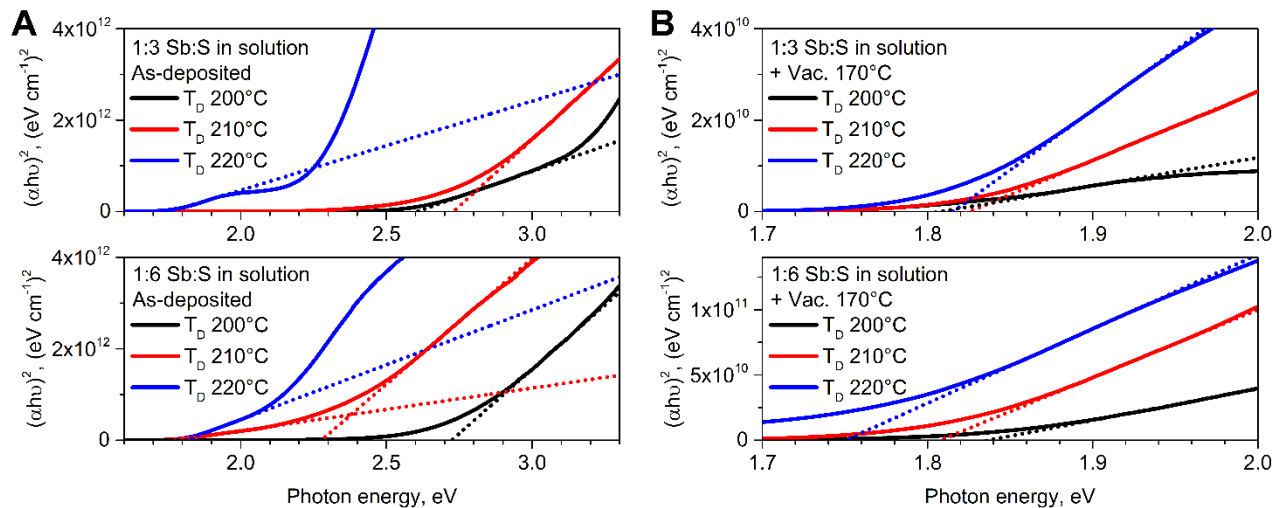

**Figure S12:**  $(\alpha h\nu)^2$  vs  $h\nu$  of as-deposited (A) and vacuum heat treated (170 °C) (B) Sb<sub>2</sub>S<sub>3</sub> layers. Sb<sub>2</sub>S<sub>3</sub> layers were deposited on glass/ITO/TiO<sub>2</sub> substrate from Sb/S 1:3, or Sb/S 1:6 precursor solution at  $T_D$  200, 210, 220 °C.



## References

1. Piacente, V.; Scardala, P.; Ferro, D. *J. Alloys Compd.* **1992**, *178*, No. 1, 101–115.
2. Perry, R. H.; Green, D. W.; Maloney, J. O., Eds.; *Perry's Chemical engineers' handbook*, 7th ed.; McGraw-Hill, 1997.
